# Supplementary material for: Plasma cells in human pancreatic ductal adenocarcinoma secrete antibodies against self-antigens
Source: JCI journal article supplement (doi:10.1172/jci.insight.172449), 2023-09-26
Supplement: sd1 [file 1]

**Title: Plasma cells in human pancreatic ductal adenocarcinoma secrete antibodies to self-antigens**

**Authors:** Min Yao<sup>1‡</sup>, Jonathan Preall<sup>1</sup>, Johannes T.-H. Yeh<sup>1</sup>, Darryl Pappin<sup>1</sup>, Paolo Cifani<sup>1</sup>, Yixin Zhao<sup>1</sup>, Sophia Shen<sup>2</sup>, Philip Moresco<sup>1,3,4</sup>, Brian He<sup>1</sup>, Hardik Patel<sup>1</sup>, Amber N. Habowski<sup>1</sup>, Daniel A. King<sup>5</sup>, Kara Raphael<sup>5</sup>, Arvind Rishi<sup>5</sup>, Divyesh Sejpal<sup>5‡</sup>, Matthew J. Weiss<sup>5</sup>, David Tuveson<sup>1</sup>, Douglas T. Fearon<sup>1,6\*</sup>

**Supplementary material**

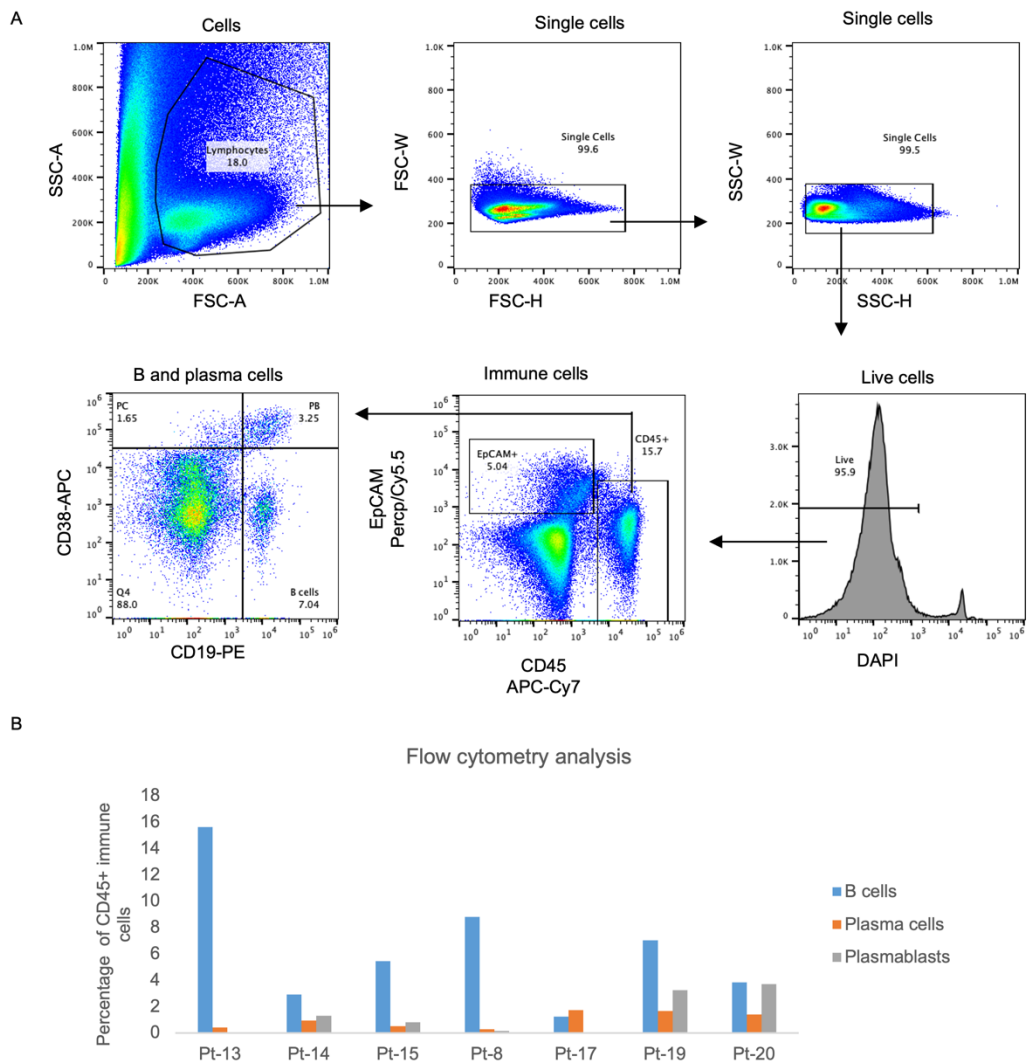

**Figure S1. Characterization of B and plasma cells in primary PDAC microenvironment by flow cytometry for the samples used for single-cell sequencing.**

(A) Representative flow cytometry gating strategy, shown by data from patient 19. Note that samples from patients 13, 14, 15 and 8, did not stain with EpCAM, thus the immune cells were gated with CD45<sup>+</sup> only. For samples 17, 19, and 20, EpCAM<sup>-</sup>CD45<sup>+</sup> was used for gating of immune cells. (B) Percentage of B cells (CD19<sup>+</sup>CD38<sup>-/low</sup>), mature plasma cells (CD38<sup>hi</sup>CD19<sup>-</sup> PC), and plasmablast cells (CD19<sup>+</sup>CD38<sup>+</sup>) of total CD45 immune cells in each of the seven samples used for single-cell sequencing.

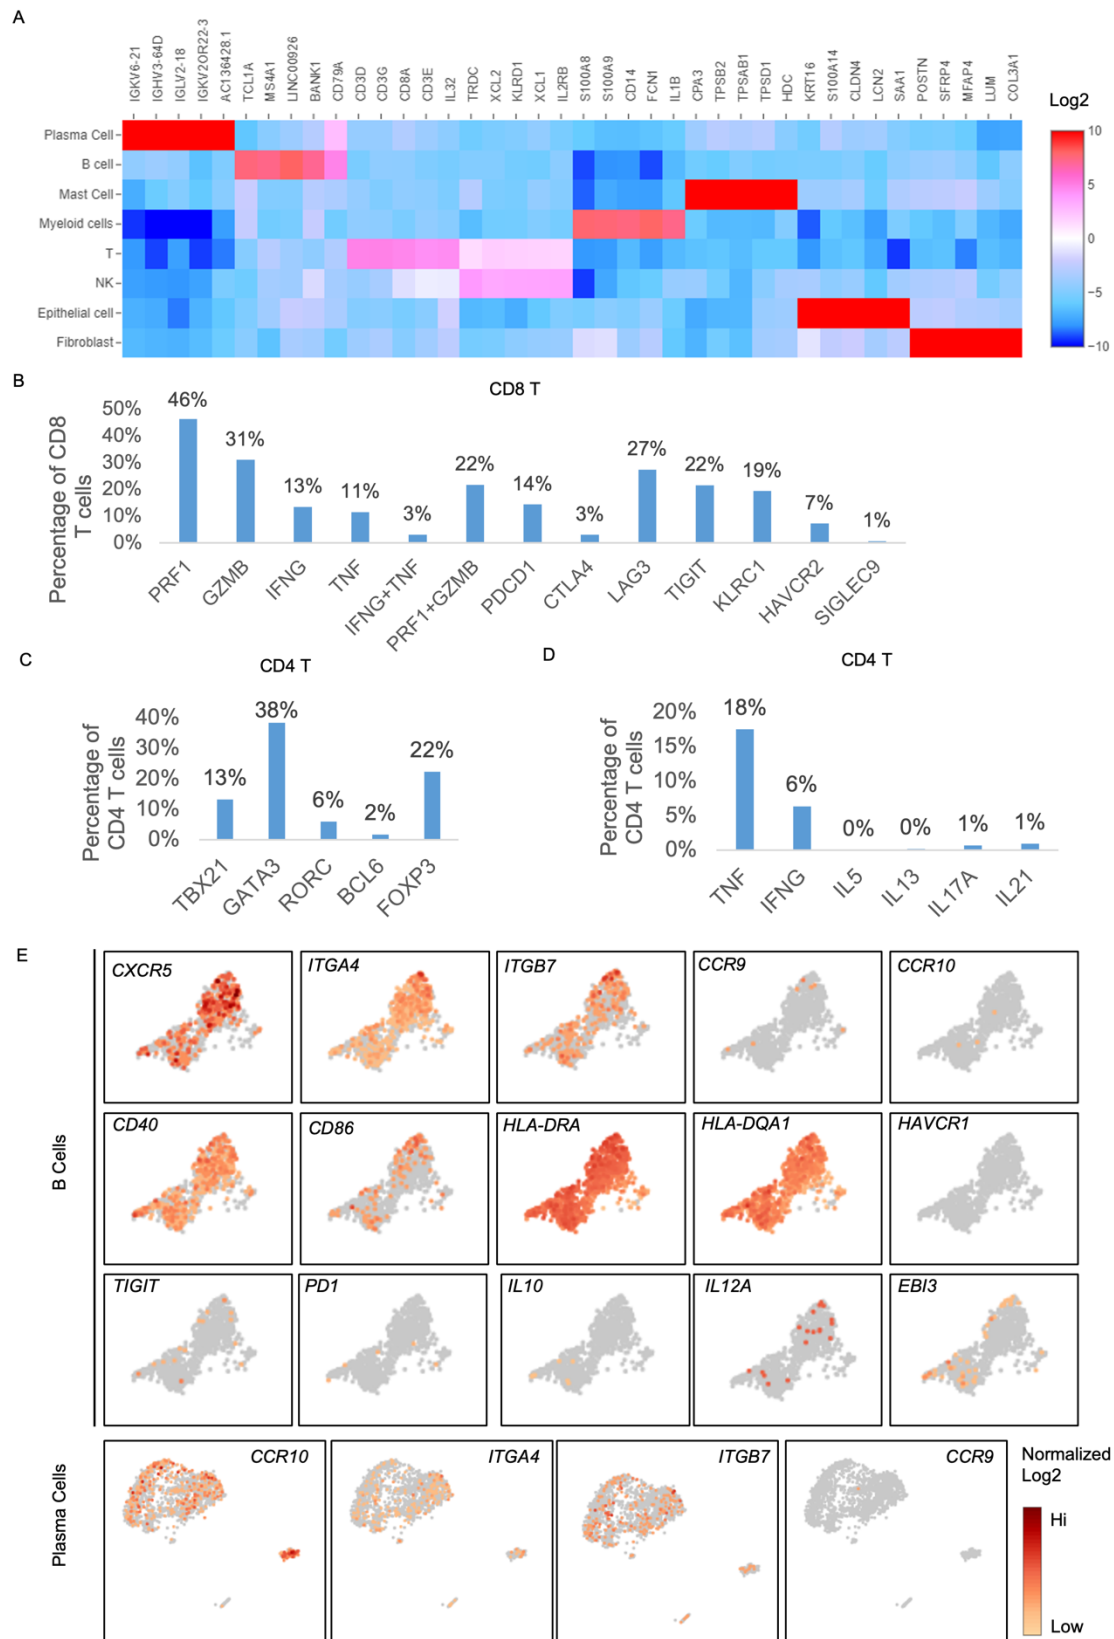

**Figure S2. Characterization of primary PDAC immune cells microenvironment by scRNA-Seq.**

**(A)** Heatmap of the top five most upregulated genes in each cell cluster defined in Figure 1A. Color scale is log2 fold change. **(B-D)** The percentage of cells expressing selected gene markers in the clusters of CD8 T **(B)** and CD4 **(C, D)**. **(E)** Selected genes expression in B cells and PCs.



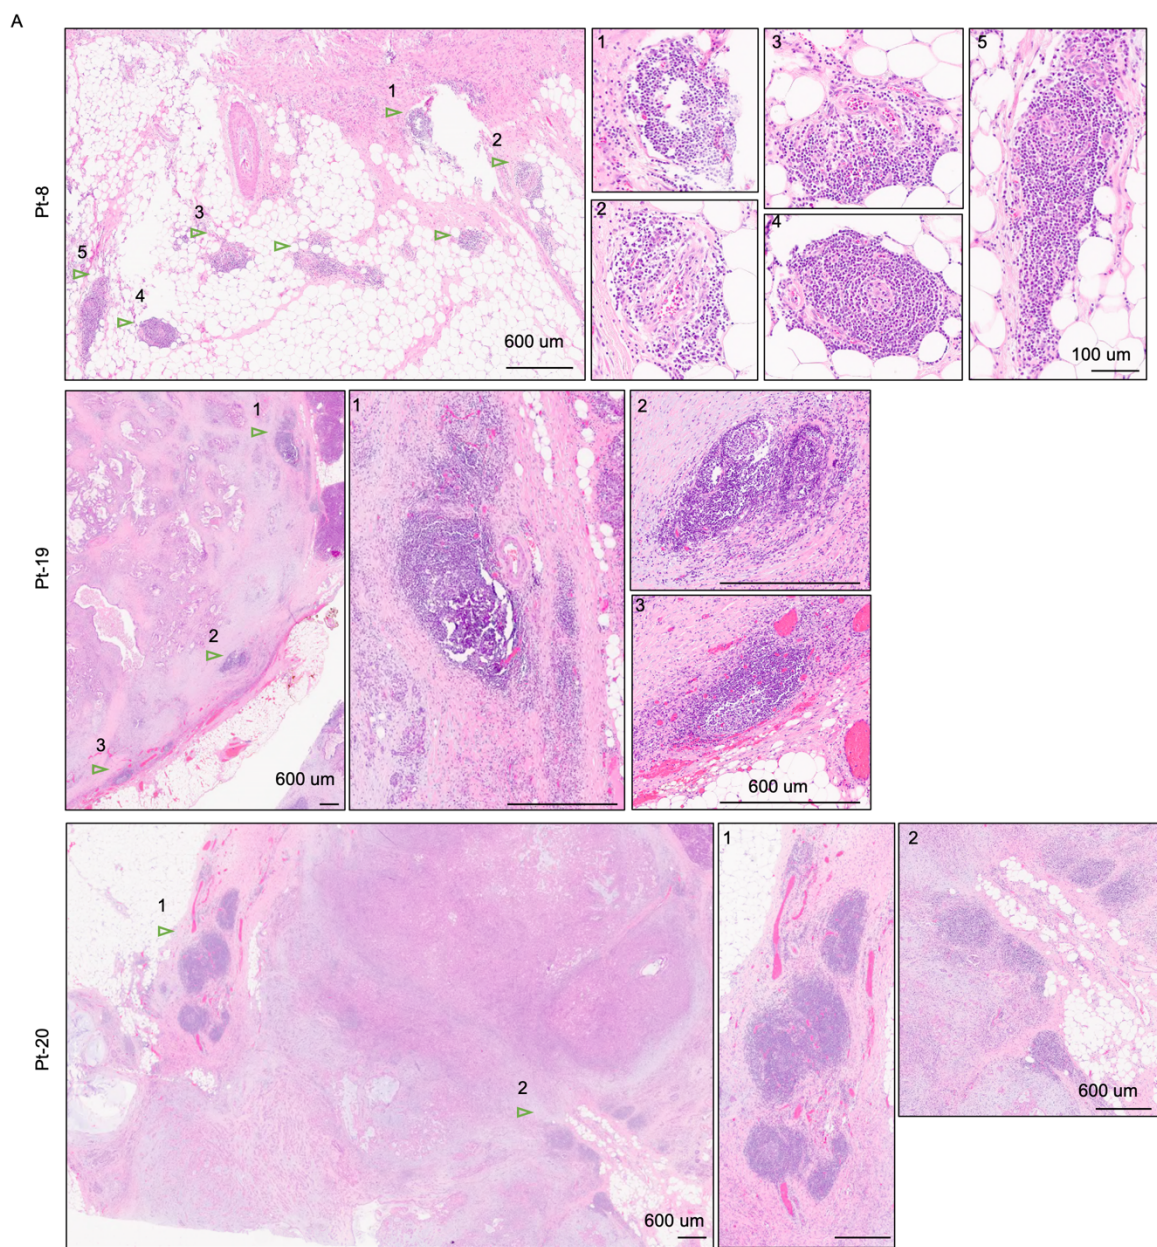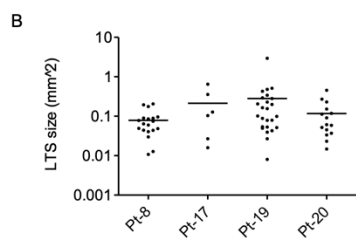

**Figure S3. Presence of TLS-like structures in PDAC.**

**(A)** Examples of TLS-like structures in patients 8, 19 and 20 (TLS indicated by arrowhead and labeled by numbers). The zoom-in images were shown on the right. Scale bar is shown in figures. **(B)** Quantification and size distribution of the TLS in the four resected PDAC samples. Only TLS with size bigger than 0.01 mm<sup>2</sup> was analyzed. Individual data point and mean are shown in **(B)**.

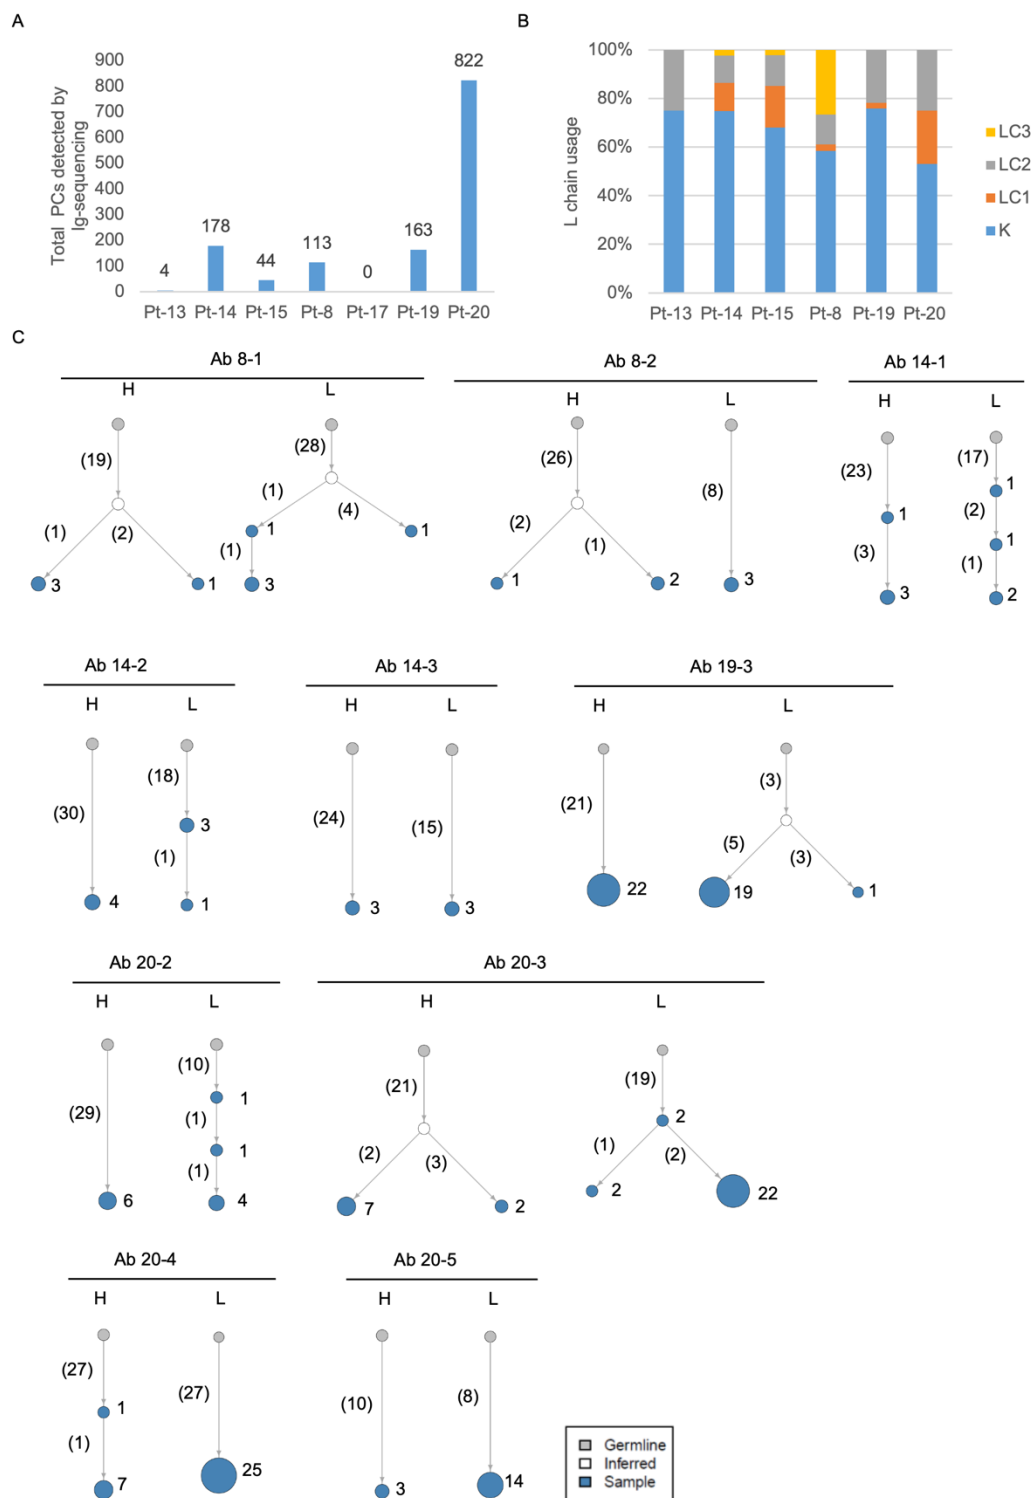

**Figure S4. Ig sequencing summary and additional Ig sequences evolution trees from PCs in PDAC.**

**(A)** Total numbers of PCs detected by Ig sequencing, including PCs with paired H and L chains were sequenced (shown in Figure 2A) and PCs with only single H or L chains (unpaired) were sequenced. **(B)** Frequency of light constant chains usage among the PCs in individual samples. **(C)** Additional examples of antibody lineage evolution among top expanded PC clones screened in this study. Clone size is indicated by the size of the node (not scaled) and labeled by numbers on the right. The clone size includes both paired and unpaired chains. Number of somatic mutations in combined V(D)J regions is shown in parenthesis.

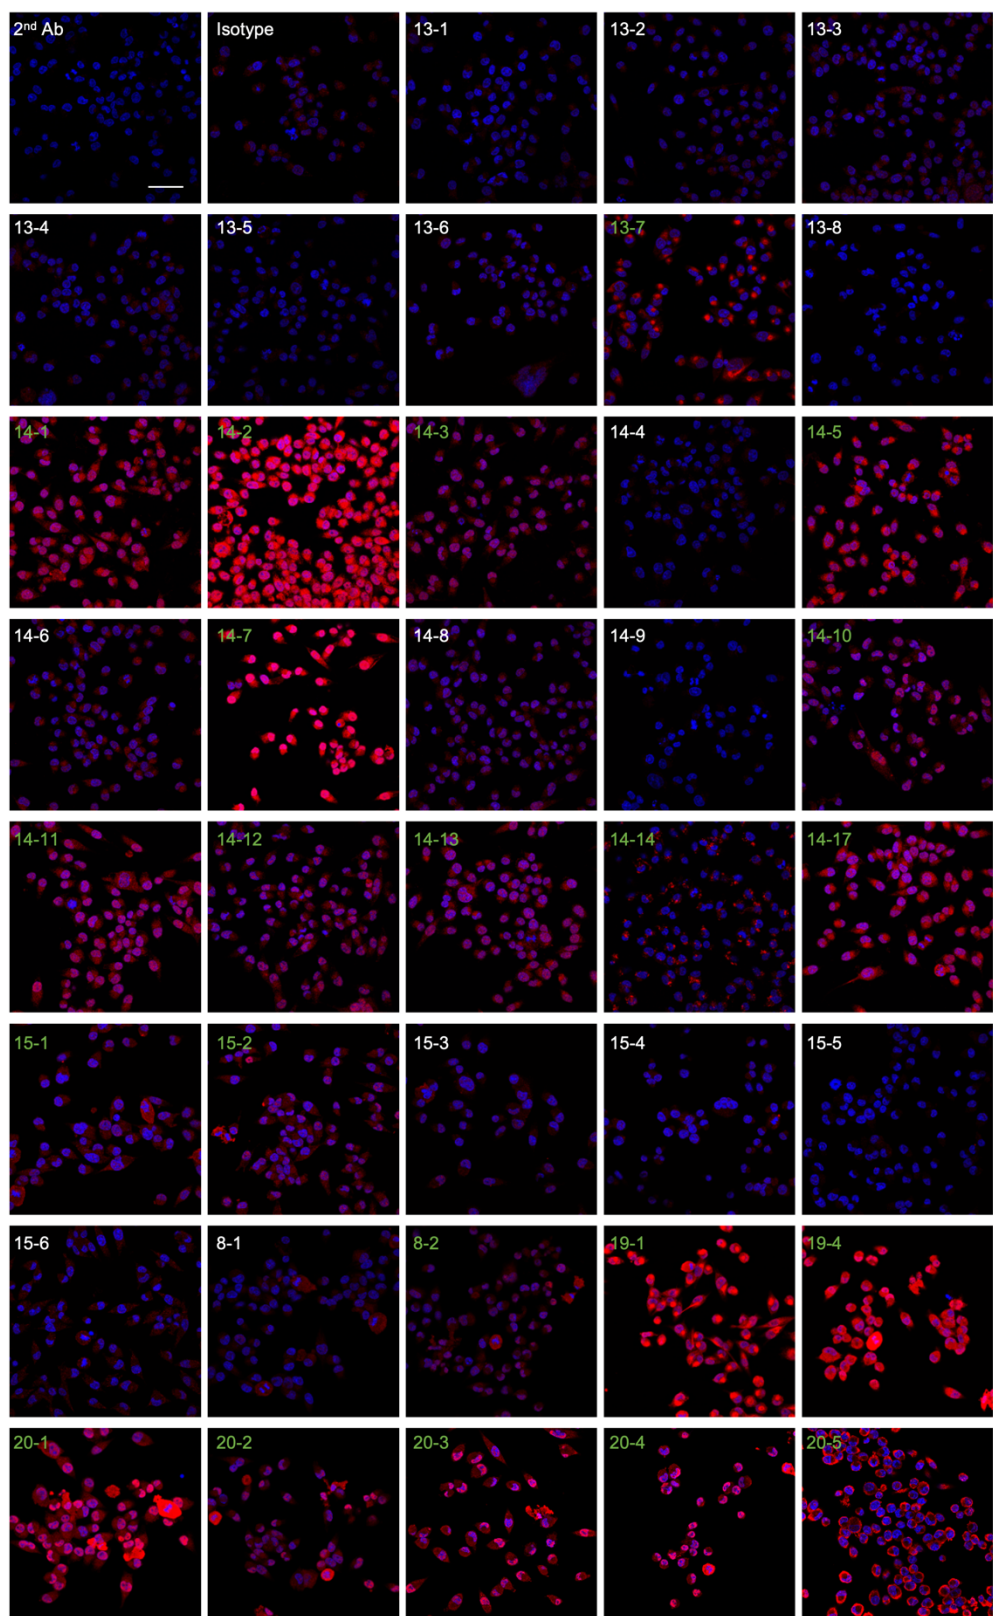

**Figure S5. Antibodies staining atlas on MiaPaca2 cell line.**

MiaPaca2 cells were stained with each antibody (red) and co-stained with DAPI (blue). Secondary antibody only (2<sup>nd</sup> Ab) and isotype IgG were used as control. Antibodies with positive staining are labeled green, and antibodies with negative staining are labeled white. Antibodies staining of 8-3, 19-3 and 15-7 were shown in the main figures and not included here. All images were acquired using the same confocal setting for isotype control staining, and the gain on the query antibody was reduced if the images were saturated. The experiment was repeated three times. Scale bar is 50um.



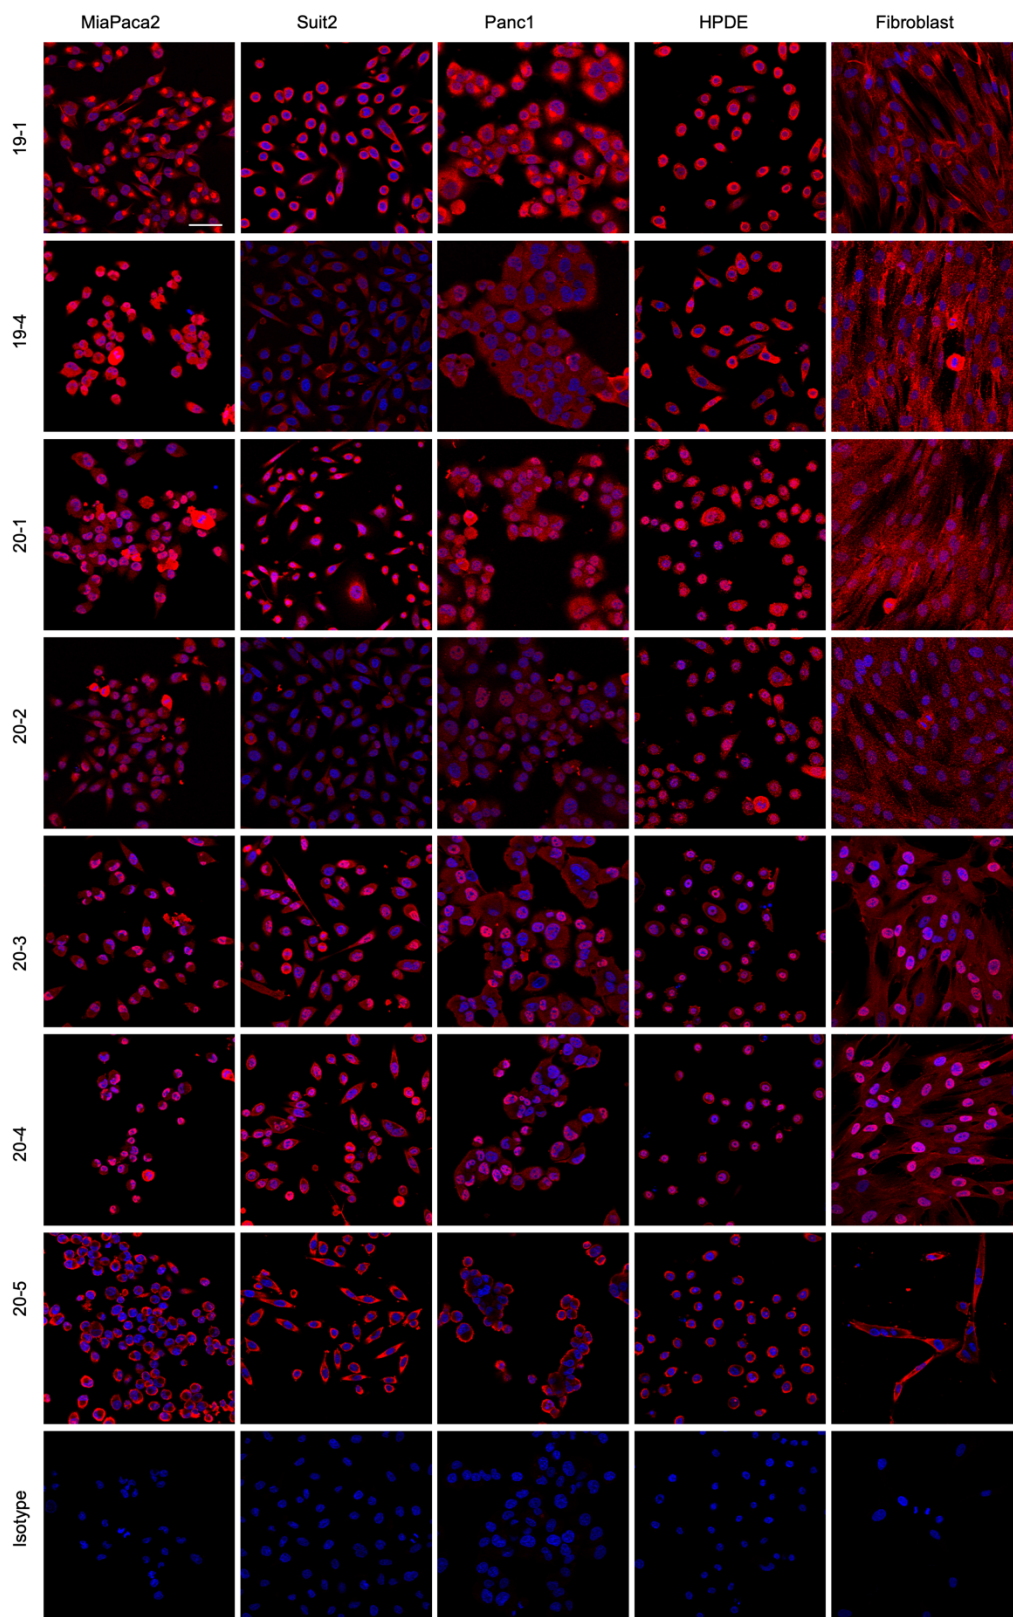

**Figure S6. Examples of antibodies staining in PDAC and non-cancer cell lines.**

Cells were stained with each antibody (red) and co-stained with DAPI (blue). The experiment was repeated three times. Scale bar is 50um.





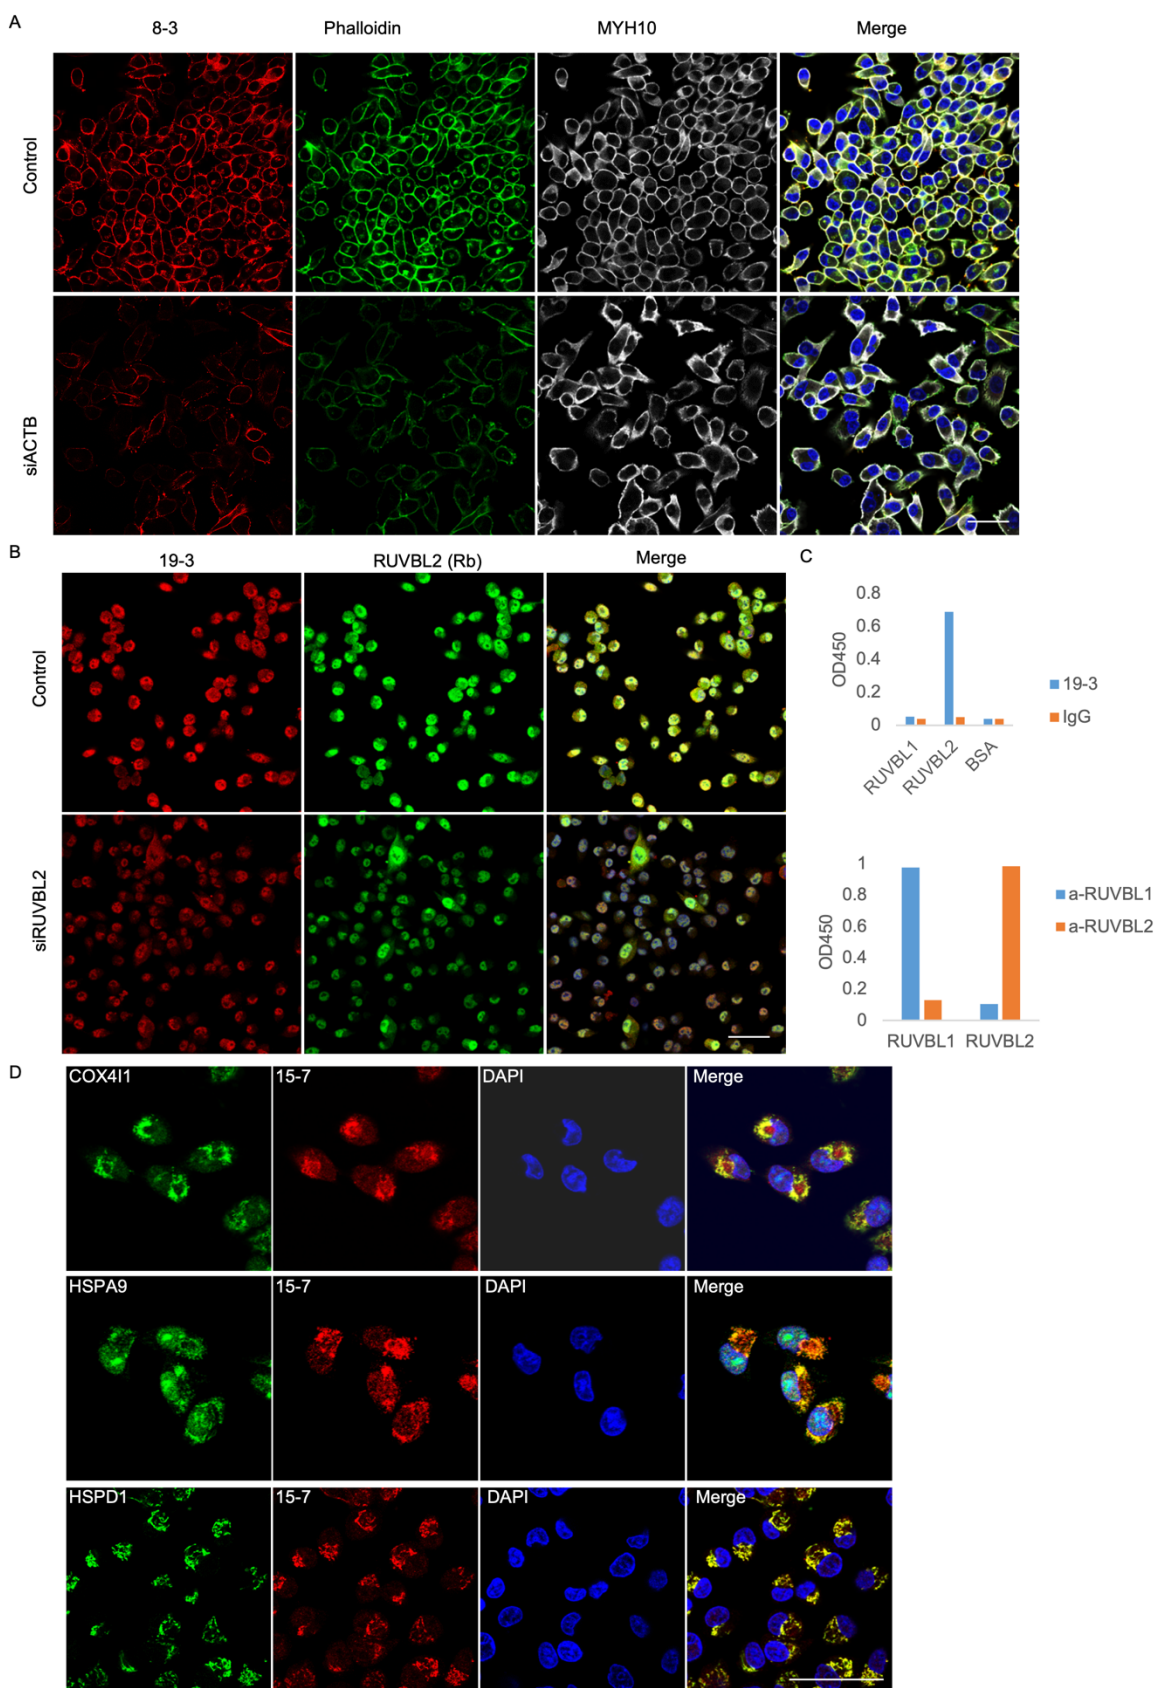

**Figure S7. Characterization of antibodies 8-3, 19-3 and 15-7.**

(A) 8-3 staining after siRNA knockdown of *ACTB* in MiaPaca2 cells, co-stained with phalloidin, MYH10 antibody and DAPI. (B) Measurement of 19-3 binding to recombinant RUVBL1 and RUBL2 proteins by ELISA. Positive controls using polyclonal rabbit antibodies anti-RUVBL1 (a-RUVBL1) or anti-RUVBL2 (a-RUVBL2). (C) 19-3 staining after siRNA knockdown of *RUVBL2* in MiaPaca2 cells, co-stained with anti-RUVBL2 rabbit antibody and DAPI. (D) Co-staining of 15-7 with mitochondria markers COX4I1, HSPA9 and HSPD1 in MiaPaca2 cells. Each experiment was repeated twice. Scale bars in A, C and D are 50um.

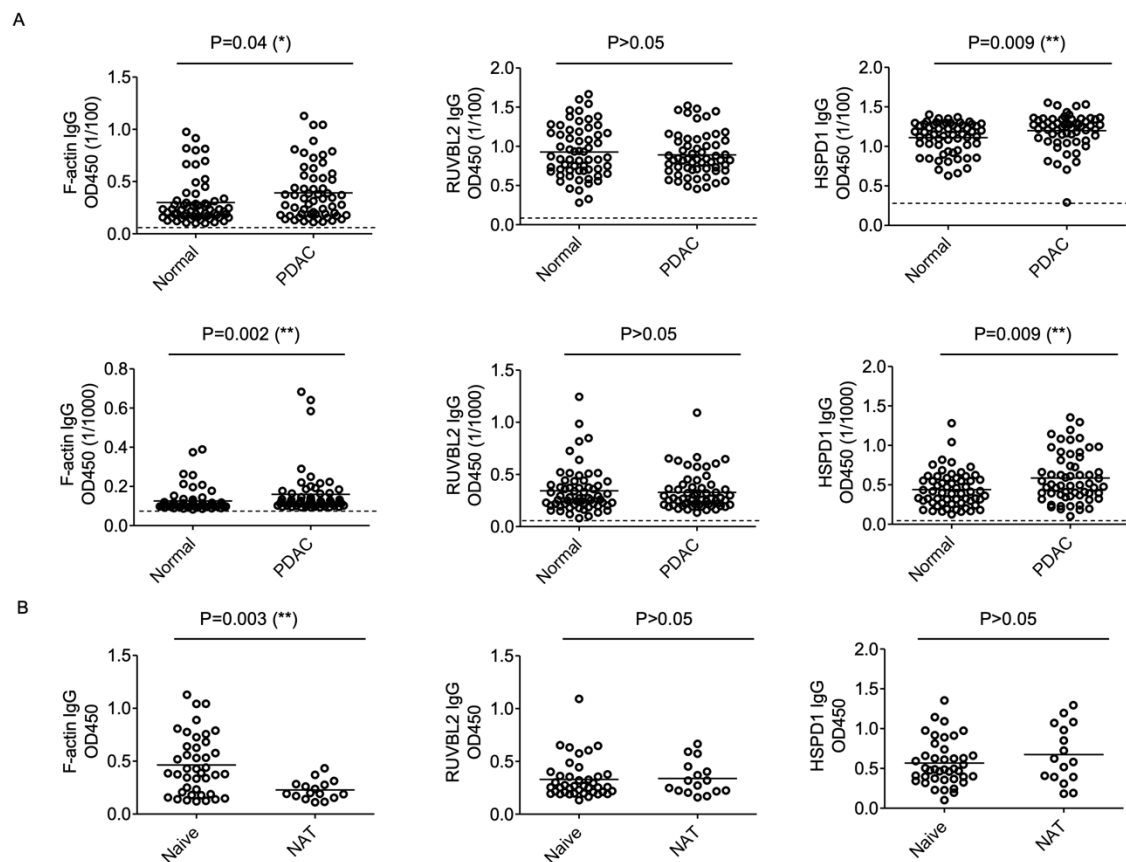

**Figure S8. Comparison of plasma IgG titers to F-actin, RUVBL2 and HSPD1 between healthy donors and PDAC patients. (A)** Comparison of IgG titer to F-actin, RUVBL2 and HSPD1 of plasma samples diluted at 1/100 or 1/1000 by ELISA. Background signals from secondary antibody only are shown in a dashed line. **(B)** Comparison of IgG response to F-actin, RUVBL2 and HSPD1 between naïve treated (naive) and neoadjuvant treated (NAT) PDAC patients. The non-parametric t-test is used for comparisons. The individual data points and mean are shown in all figures. The experiment was repeated twice.

214 **Table S1. Human PDAC samples information for scRNA-Seq and Ig sequencing studies.**

|                                 |           |                          |                  |             |                 |           |                  |
|---------------------------------|-----------|--------------------------|------------------|-------------|-----------------|-----------|------------------|
| <b>Patient ID</b>               | Pt-8      | Pt-17                    | Pt-19            | Pt-20       | Pt-13           | Pt-14     | Pt-15            |
| <b>Diagnosis</b>                | PDAC      | PDAC                     | PDAC             | PDAC        | PDAC            | PDAC      | PDAC             |
| <b>Collection method</b>        | resection | resection                | resection        | resection   | FNA             | FNA       | FNA              |
| <b>Age</b>                      | 58        | 75                       | 71               | 67          | 40              | 89        | 53               |
| <b>Gender</b>                   | Male      | Male                     | Female           | Female      | Female          | Male      | Female           |
| <b>Race</b>                     | Caucasian | Caucasian                | African-American | Asian       | Latino/Hispanic | Caucasian | African American |
| <b>Neoadjuvant therapy</b>      | No        | No                       | No               | No          | No              | No        | No               |
| <b>TNM stage</b>                | pT2N2Mx   | pT2N1Mx                  | pT2N1            | pT2N0       | NA              | NA        | NA               |
| <b>Tumor size (cm)</b>          | 2.2*1.5*1 | 2.7*2.6*2.5              | 2.7*2.3*2.2      | 2.2*1.7*0.8 | NA              | NA        | NA               |
| <b>MSI status</b>               | MSS       | MSS                      | MSS              | MSS         | NA              | NA        | NA               |
| <b>Tumor organoid available</b> | Yes       | No                       | No               | Yes         | Yes             | Yes       | No               |
| <b>Tumor section available</b>  | Yes       | Yes                      | Yes              | Yes         | No              | No        | No               |
| <b>scRNA-Seq</b>                | Yes       | Yes                      | Yes              | Yes         | Yes             | Yes       | Failed           |
| <b>Ig sequencing</b>            | Yes       | Yes (low B and PC cells) | Yes              | Yes         | Yes             | Yes       | Yes              |

215 Abbreviations: FNA, fine needle aspiration; MSI, microsatellite instable; MSS, microsatellite stable; NA,  
216 not available/appliable

217

218

219

220

**Table S3. Human samples information for plasma studies.**

|           |                  | Normal (n=61) |       | PDAC (n=59) |       | Comparison |
|-----------|------------------|---------------|-------|-------------|-------|------------|
|           |                  | No.           | Ratio | No.         | Ratio | p value    |
| Gender    | Male             | 22            | 36%   | 22          | 37%   | n.s.       |
|           | Female           | 39            | 64%   | 32          | 54%   |            |
|           | Unknown          | 0             | 0%    | 5           | 8%    |            |
| Age       | Median (range)   | 36            | 17-66 | 69.5        | 49-89 | <0.0001    |
|           | Unknown          | 0             |       | 5           |       |            |
| Race      | Asian            | 7             | 11%   | 5           | 8%    | <0.001     |
|           | African American | 13            | 21%   | 7           | 12%   |            |
|           | Caucasian        | 8             | 13%   | 40          | 68%   |            |
|           | Hispanic         | 33            | 54%   | 2           | 3%    |            |
|           | NA               | 0             | 0%    | 5           | 8%    |            |
| Treatment | Neoadjuvant      | -             |       | 16          | 27%   |            |
|           | No pre-treatment | -             |       | 41          | 69%   |            |
|           | NA               | -             |       | 2           | 3%    |            |
| T stage   | T1               | -             |       | 4           | 7%    |            |
|           | T2               | -             |       | 26          | 44%   |            |
|           | T3               | -             |       | 13          | 22%   |            |
|           | T4               | -             |       | 1           | 2%    |            |
|           | NA               | -             |       | 15          | 25%   |            |
| N stage   | N0               | -             |       | 15          | 25%   |            |
|           | N1               | -             |       | 17          | 29%   |            |
|           | N2               | -             |       | 12          | 20%   |            |
|           | NA               | -             |       | 15          | 25%   |            |
| M stage   | Mx               | -             |       | 54          | 92%   |            |
|           | M1               | -             |       | 5           | 8%    |            |
